# Supplementary material for: Pan-Genomic and Transcriptomic Analyses of Marine Pseudoalteromonas agarivorans Hao 2018 Revealed Its Genomic and Metabolic Features
Source: MDPI journal article supplement (doi:10.3390/md20040248), 2022-03-31
Supplement: s1 [file s1]

## Supplementary Information

### Pan-genomic and Transcriptomic Analyses of Marine *Pseudoalteromonas agarivorans* Hao 2018 Revealed Its Genomic and Metabolic Features

Yuhao Jv <sup>1</sup>, Chenxiang Xi <sup>1</sup>, Yanqiu Zhao <sup>1</sup>, Wei Wang <sup>1</sup>, Yiling Zhang <sup>1</sup>, Kai Liu <sup>1</sup>, Wenlin Liu <sup>1</sup>, Kai Shan <sup>1</sup>, Chunlei Wang <sup>1</sup>, Ruiwen Cao <sup>1</sup>, Cunxi Dai <sup>1</sup>, Yiting Jv <sup>1</sup>, Wenxing Zhu <sup>1</sup>, Haiyong Wang <sup>1</sup>, Qiuxia He <sup>1</sup> and Lujiang Hao <sup>1,2,\*</sup>

<sup>1</sup> School of Bioengineering, Qilu University of Technology (Shandong Academy of Sciences), Jinan 250353, China; 10431201111@stu.qlu.edu.cn (Y.J.); 1043119587@stu.qlu.edu.cn (C.X.); 10431211120@stu.qlu.edu.cn (Y.Z.); 10431211258@stu.qlu.edu.cn (W.W.); 10431200980@stu.qlu.edu.cn (Y.Z.); kai\_liu2018@163.com (K.L.); 1043118323@stu.qlu.edu.cn (W.L.); kai\_shan@163.com (K.S.); chunlei\_wang79@163.com (C.W.); rwcao@qlu.edu.cn (R.C.); 201996080002@stu.qlu.edu.cn (C.D.); 202181010040@stu.qlu.edu.cn (Y.J.); wenxingzhu@qlu.edu.cn (W.Z.); wangchemical@126.com (H.W.); heqiuxia2022@126.com (Q.H.)

<sup>2</sup> State Key Laboratory of Biobased Material and Green Papermaking, Qilu University of Technology (Shandong Academy of Sciences), Jinan 250353, China.

\* Correspondence: lujiang\_hao@qlu.edu.cn

**Figure S1.** A neighbor-joining tree based on 16S rRNA gene sequences, showing the phylogenetic relationships between strain Hao 2018 and closely related *Pseudoalteromonas* type strains by MEGA7. Bootstrap values are shown on branching nodes as percentages of 1000 replicates for values over 70%. *Pseudoalteromonas aestuarii* DB-2T (KT366926) was used as an outgroup. Bar, 0.002 changes per nucleotide position.

**Figure S2.** RPKM density discretization (a) and (b) statistical box plots of RPKM density distribution in the two groups of samples.

**Figure S3.** RPKM saturation in two samples of (a) 2h and (b) 24h.

**Figure S4.** Correlation test for two samples of 2h and 24h.

**Figure S5.** Principal component analysis.

**Table S1.** Statistics of data filtering results.

**Table S2.** Sequence mapping result statistics.

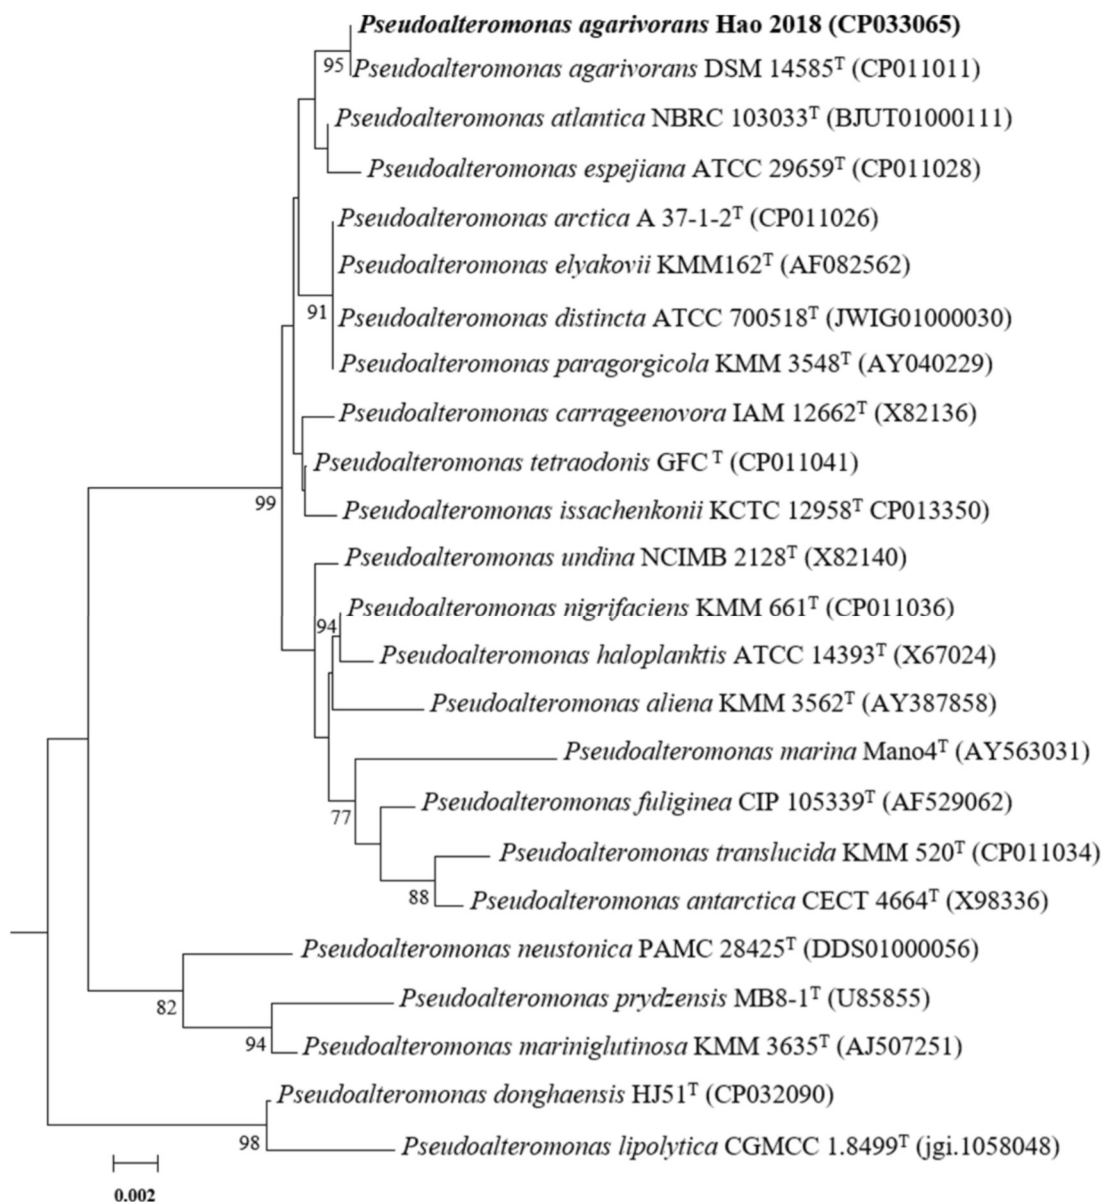

**Figure S1.** A neighbor-joining tree based on 16S rRNA gene sequences, showing the phylogenetic relationships between strain Hao 2018 and closely related *Pseudoalteromonas* type strains by MEGA7. Bootstrap values are shown on branching nodes as percentages of 1000 replicates for values over 70%. *Pseudoalteromonas aestuarii* DB-2T (KT366926) was used as an outgroup. Bar, 0.002 changes per nucleotide position.

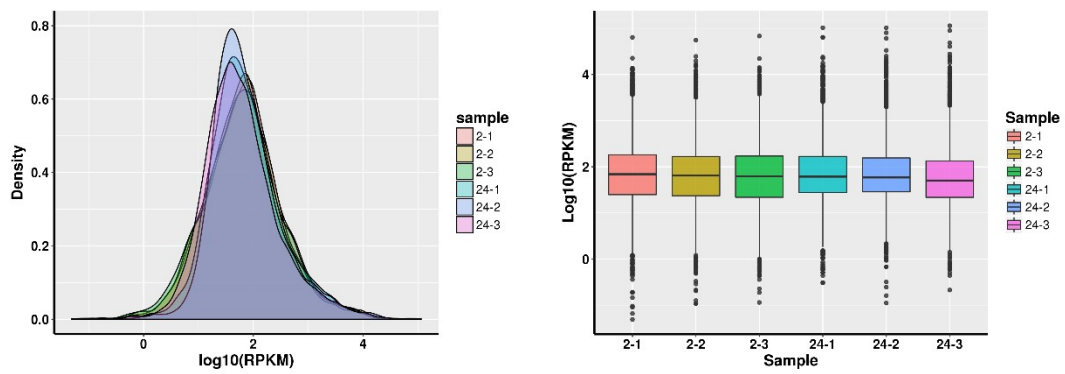

**Figure S2.** RPKM density discretization (a) and (b) statistical box plots of RPKM density distribution in the two groups of samples.

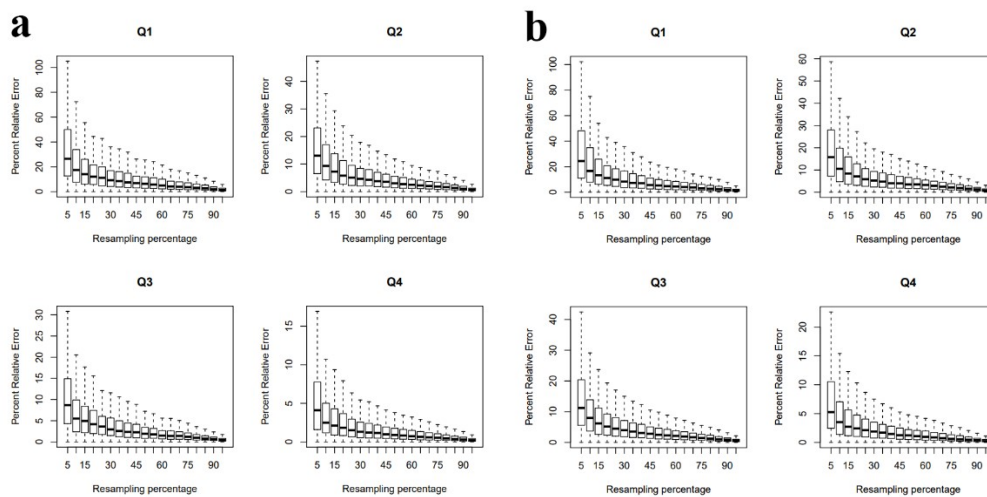

**Figure S3.** RPKM saturation in two samples of (a) 2h and (b) 24h.

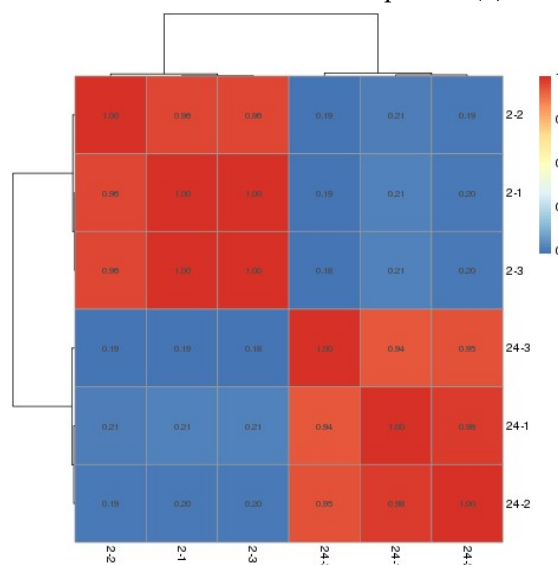

**Figure S4.** Correlation test for two samples of 2h and 24h.

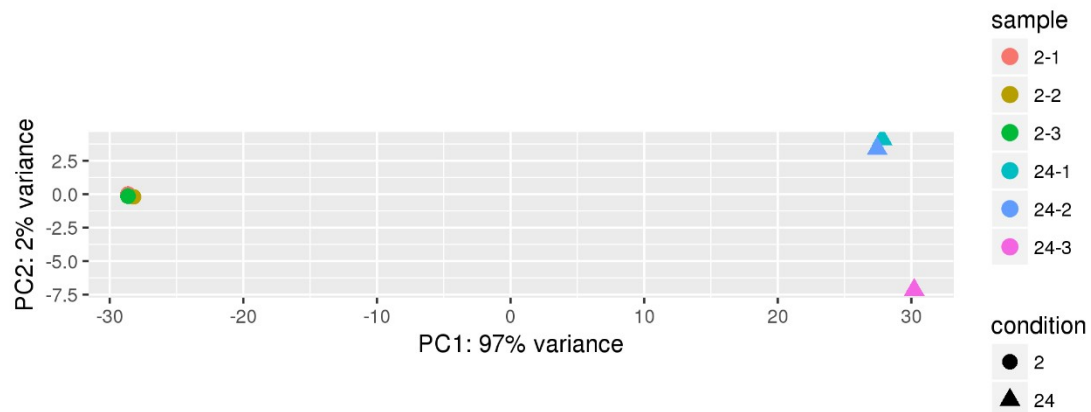

**Figure S5.** Principal component analysis.

**Table S1. Statistics of data filtering results**

| Sample | Useful Reads | Total Mapped Reads<br>number and<br>percentage |        | Uniquely Mapped<br>Reads number and<br>percentage |        | Multiple Mapped<br>Reads number and<br>percentage |       |
|--------|--------------|------------------------------------------------|--------|---------------------------------------------------|--------|---------------------------------------------------|-------|
| 2-1    | 35,539,354   | 35,293,023                                     | 99.31% | 34,100,616                                        | 96.62% | 1,192,407                                         | 3.38% |
| 2-2    | 32,827,394   | 32,562,294                                     | 99.19% | 31,511,500                                        | 96.77% | 1,050,794                                         | 3.23% |
| 2-3    | 30,147,348   | 29,885,919                                     | 99.13% | 28,776,927                                        | 96.29% | 1,108,992                                         | 3.71% |
| 24-1   | 36,407,882   | 36,102,399                                     | 99.16% | 35,573,729                                        | 98.54% | 528,670                                           | 1.46% |
| 24-2   | 32,234,184   | 32,034,111                                     | 99.38% | 31,667,698                                        | 98.86% | 366,413                                           | 1.14% |
| 24-3   | 36,228,242   | 35,964,709                                     | 99.27% | 35,482,252                                        | 98.66% | 482,457                                           | 1.34% |

**Table S2. Sequence mapping result statistics**

| Sample | Clean Reads<br>No. | Clean Data<br>(bp) | GC (%) | Clean Reads<br>(%) | Clean Data<br>(%) |
|--------|--------------------|--------------------|--------|--------------------|-------------------|
| 2-1    | 35,539,354         | 5,315,365,568      | 42.93  | 99.74              | 99.45             |
| 2-2    | 32,827,394         | 4,911,816,504      | 43.26  | 99.72              | 99.47             |
| 2-3    | 30,147,348         | 4,510,663,522      | 43.03  | 99.71              | 99.45             |
| 24-1   | 36,407,882         | 5,448,102,540      | 44.49  | 99.36              | 99.12             |
| 24-2   | 32,234,184         | 4,824,059,398      | 43.86  | 99.70              | 99.47             |
| 24-3   | 36,228,242         | 5,419,476,838      | 44.34  | 99.69              | 99.42             |
